# Supplementary material
Source: PubMed Central journal article supplement (PMC6237269)
Supplement: NIHMS79920-supplement-Supplementary_Information.pdf [file NIHMS79920-supplement-Supplementary_Information.pdf]

**Supplementary information for**

**The environmental costs and benefits of high-yield farming**

Balmford, A., T. Amano, H. Bartlett, D. Chadwick, A. Collins, D. Edwards, R. Field, P. Garnsworthy, R. Green, P. Smith, H. Waters, A. Whitmore, D.M. Broom, J. Chara, T. Finch, E. Garnett, A. Gathorne-Hardy, J. Hernandez-Medrano, M. Herrero, F. Hua , A. Latawiec, T. Misselbrook, B. Phalan, B. I. Simmons, T. Takahashi, J. Vause, E. zu Ermgassen & R. Eisner.

## Supplementary Figures

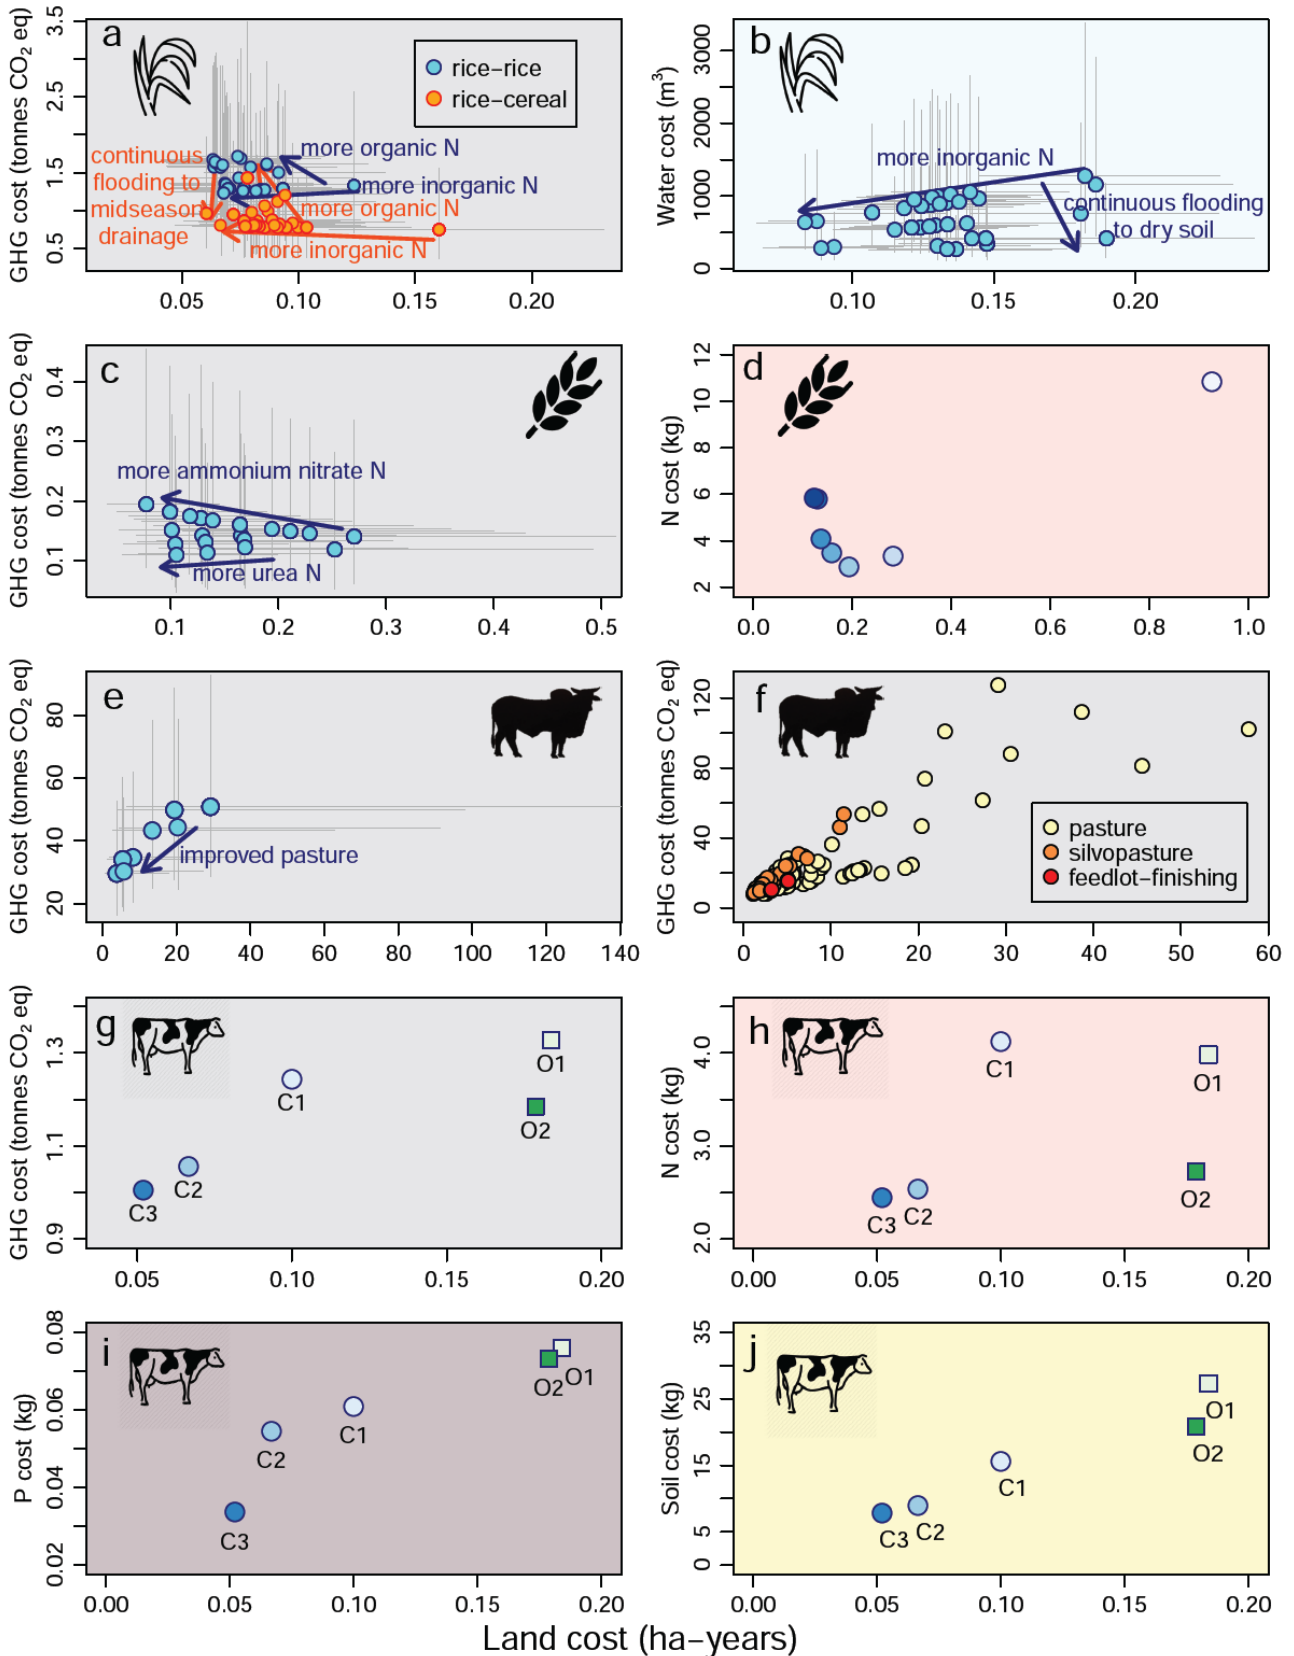

**Supplementary Figure 1. Externality costs of alternative production systems against land cost for five externalities in four agricultural sectors, showing uncertainty for statistically derived estimates.** Plots are modified versions of those in Fig. 2, with pale grey lines in a, b, c and e representing 95% confidence intervals around our GLMM-derived predictions. All other notation as in Fig. 2.

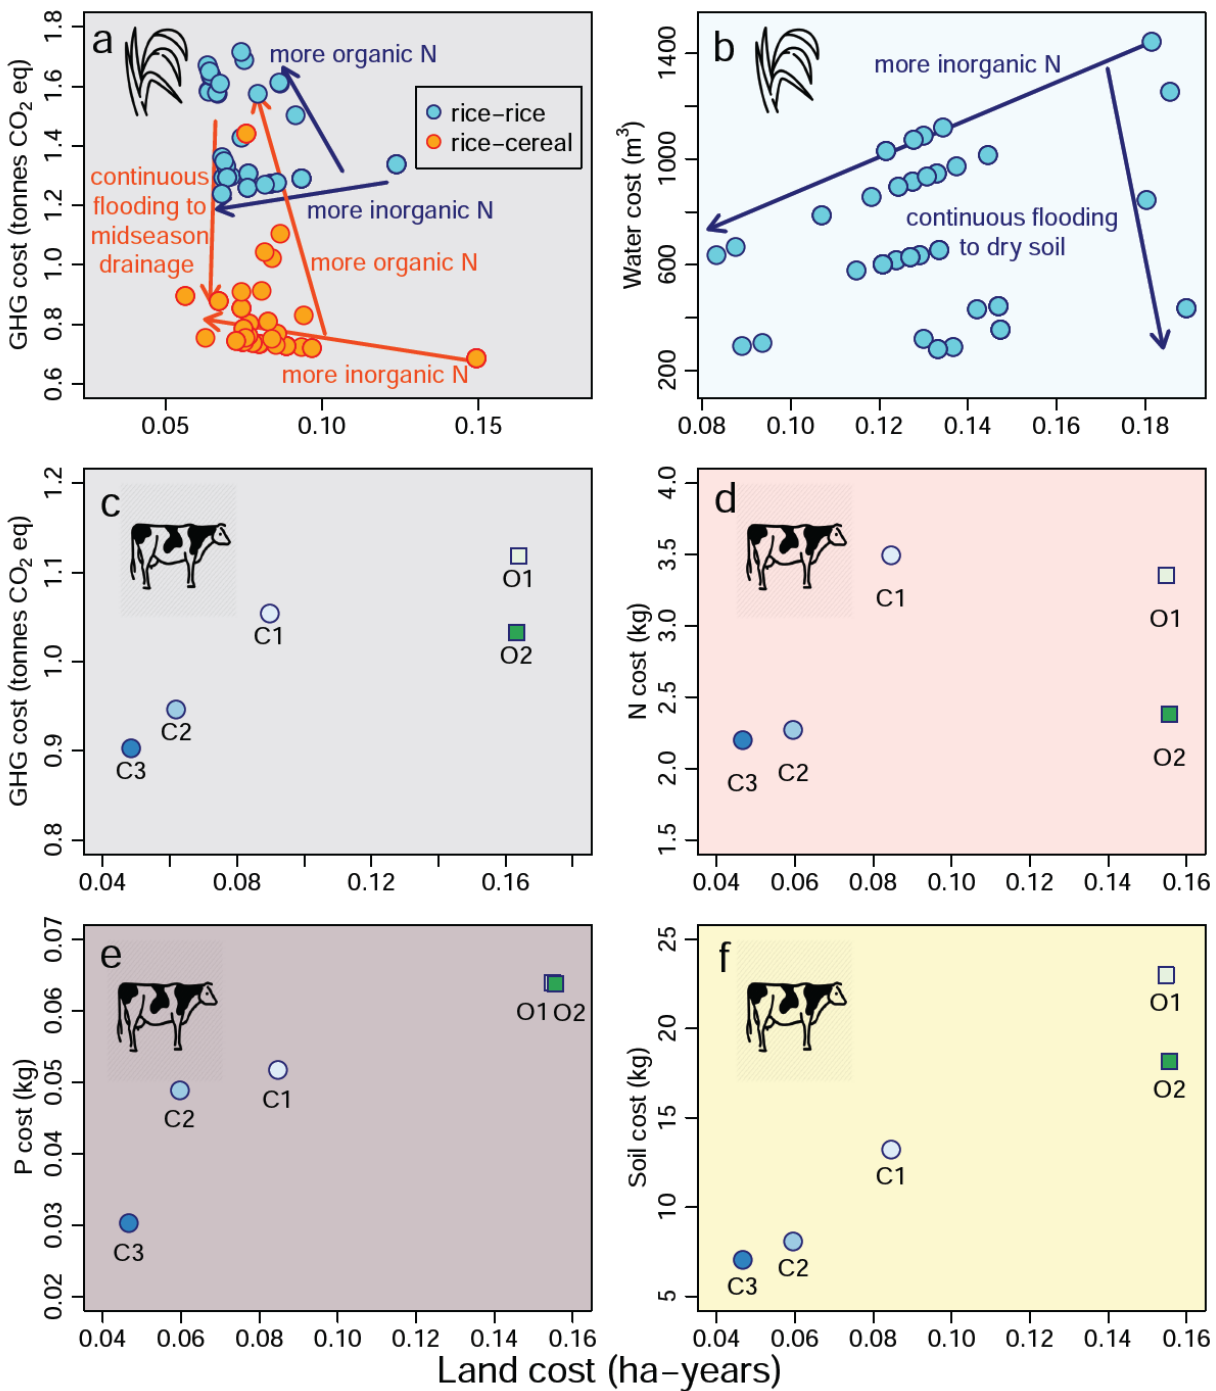

**Supplementary Figure 2. Sensitivity tests of associations between externality costs and land costs.** Plots are modified versions of those in Fig. 2. **a**, The effect in rotational paddy systems of allocating land and GHG costs between rice and co-products based on their relative contribution to production of energy (rather than of gross monetary value; Methods). **b**, The effect on the association between water cost and land cost of paddy rice of excluding early-season data from the only study reporting data for two seasons per year. **c-f**, The effects in European dairy systems of allocating land and externality costs between milk and its beef co-product in proportion to their relative contribution to production of protein per unit area of farmland (rather than of gross monetary value; Methods). Notation as in Fig. 2. Spearman's rank correlation coefficients ( $p$ -values) are **a**. rice-rice: -0.51 (0.002), rice-cereal: -0.32 (0.10), **b**. 0.17 (0.34), **c**. 0.90 (0.08), **d**. 0.60 (0.35), **e**. 0.90 (0.08) and **f**. 0.90 (0.08).

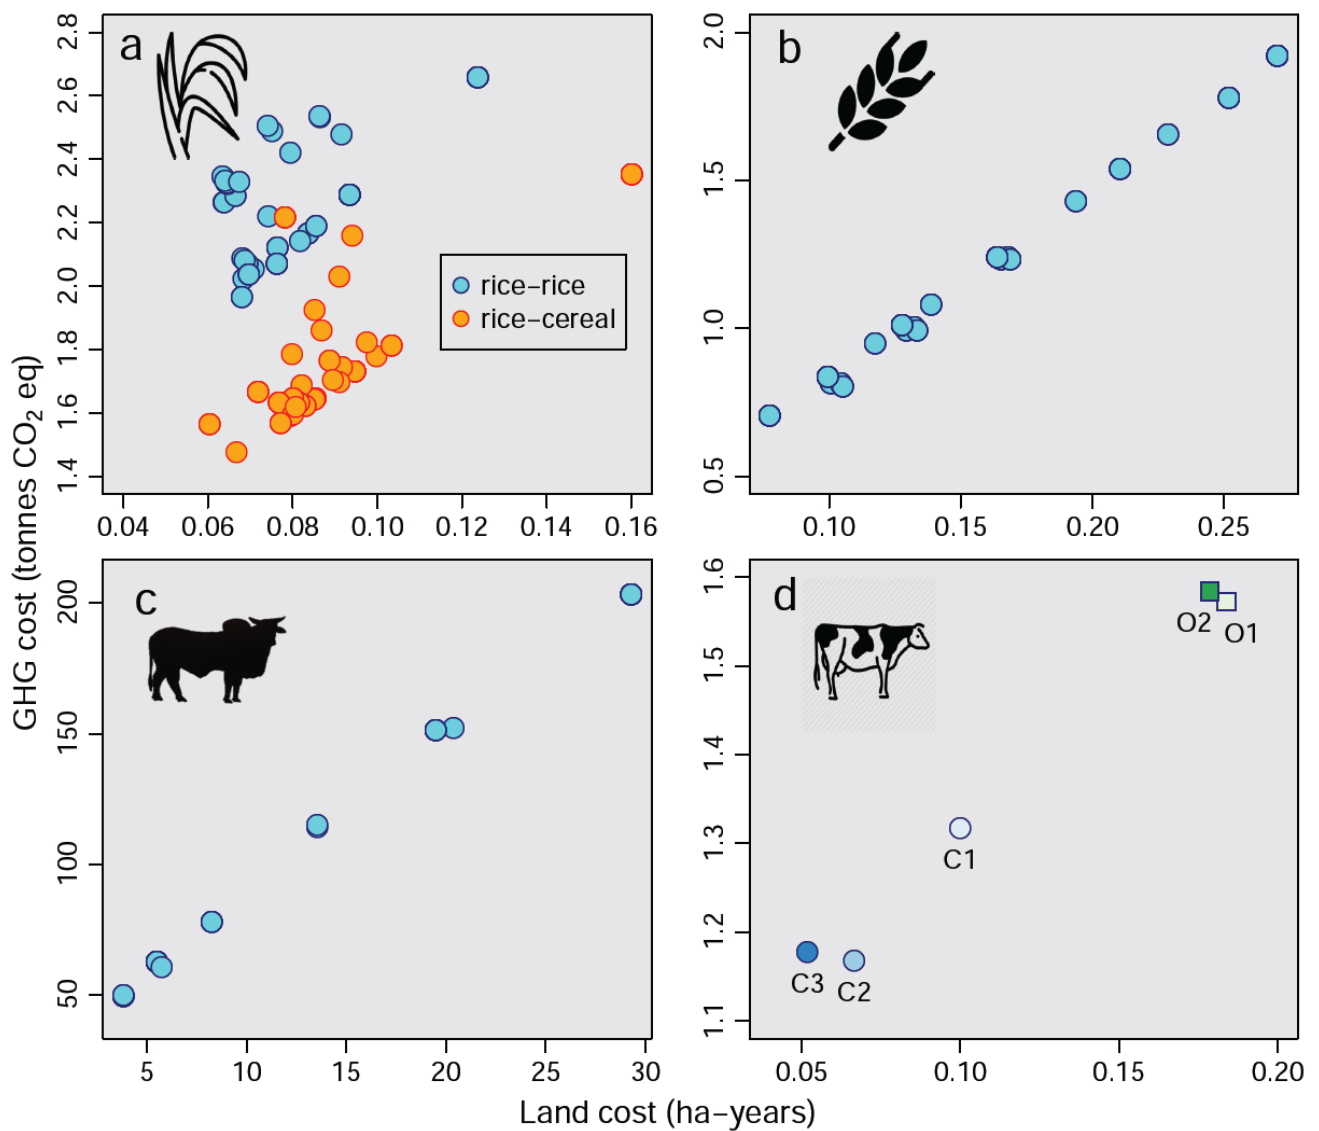

**Supplementary Figure 3. Sensitivity tests of associations between overall GHG costs (including GHG opportunity costs of land use) and land costs.** Plots are modified versions of those in Fig. 3, but show the effects of assuming either that carbon sequestration rates of recovering habitat are half those given in IPCC guidelines or that half of the area potentially freed from farming because of higher yield is retained under agriculture (Methods); these assumptions have identical effects. Notation as in Fig. 3. Spearman's rank correlation coefficients ( $\rho$  values) are **a.** rice-rice: 0.07 (0.69), rice-cereal: 0.66 ( $< 0.001$ ), **b.** 0.97 ( $< 0.001$ ), **c.** 0.98 ( $< 0.001$ ) and **d.** 0.80 (0.13).

## Supplementary Tables

**Supplementary Table 1. Types of data used for investigating each sector-externality combination, and (*in italics*) combinations which were not considered important or which we were unable to assess. Cell entries also show where each sector-externality combination is plotted.**

| externality                     | sector | Asian paddy rice (China)                                                 | European wheat (UK)                                                    | Latin American beef (Brazil)                                                                     | European dairy (UK)                                 |
|---------------------------------|--------|--------------------------------------------------------------------------|------------------------------------------------------------------------|--------------------------------------------------------------------------------------------------|-----------------------------------------------------|
| <b>greenhouse gas emissions</b> |        | multi-site experiments providing 147 estimates from 17 studies (Fig. 2a) | multi-site experiments providing 96 estimates from 3 studies (Fig. 2c) | 8 LCA* studies providing 33 estimates + process-based model providing 144 estimates (Fig. 2e, f) | process-based model providing 5 estimates (Fig. 2g) |
| <b>water use</b>                |        | multi-site experiments providing 123 estimates from 15 studies (Fig. 2b) | <i>irrigation not widespread in UK wheat production</i>                | <i>irrigation not widespread in Brazilian beef production</i>                                    | <i>insufficient data available</i>                  |
| <b>nitrogen loss</b>            |        | <i>insufficient data available</i>                                       | single-site experiment providing 7 estimates (Fig. 2d)                 | <i>insufficient data available</i>                                                               | process-based model providing 5 estimates (Fig. 2h) |
| <b>phosphorus loss</b>          |        | <i>insufficient data available</i>                                       | <i>insufficient data available</i>                                     | <i>insufficient data available</i>                                                               | process-based model providing 5 estimates (Fig. 2i) |
| <b>soil loss</b>                |        | <i>insufficient data available</i>                                       | <i>insufficient data available</i>                                     | <i>insufficient data available</i>                                                               | process-based model providing 5 estimates (Fig. 2j) |

\*LCA = Life Cycle Assessment

**Supplementary Table 2. Details of Generalised Linear Mixed Models for the effect of management**

**variables and covariates on land and externality costs.** Estimated coefficients are shown; those whose 95% confidence intervals (in parentheses) did not overlap zero are in bold. Tillage in Rice-GHG models represents the effect of a tillage regime (compared to a no-tillage regime). Irrigation in Rice-GHG models is for the effect of episodic midseason drainage compared to continuous flooding. The effect of irrigation in Rice-Water models is based on five levels compared to continuous flooding: continuous flooding with a drainage (CF-drain), alternative wetting and drying (AWD), controlled irrigation (CI), mulches or plastic films (F-M) and long periods of dry soil (Dry). In Beef-GHG models, improved breed represents the effect of using an improved breed relative to an unimproved breed. Cell entries also show where the results of each GLMM are plotted.

| Model                                                                     |                  | Coefficients                                                                                 |                                                                                             |                                 |                                      |                                    |                                     |                                                                                             |
|---------------------------------------------------------------------------|------------------|----------------------------------------------------------------------------------------------|---------------------------------------------------------------------------------------------|---------------------------------|--------------------------------------|------------------------------------|-------------------------------------|---------------------------------------------------------------------------------------------|
| Rice - GHG                                                                |                  | Inorganic N                                                                                  | Organic N                                                                                   | Tillage                         | PC1                                  | PC2                                |                                     |                                                                                             |
| monoculture<br>n = 60<br># studies = 5<br><br>(Fig. 2a)                   | Land cost        | <b>-1.53 × 10<sup>-3</sup></b><br>(-2.13 × 10 <sup>-3</sup> ,<br>-0.94 × 10 <sup>-3</sup> )  | <b>-1.43 × 10<sup>-3</sup></b><br>(-2.35 × 10 <sup>-3</sup> ,<br>-0.50 × 10 <sup>-3</sup> ) | -0.061<br>(-0.23, 0.11)         | <b>-0.052</b><br>(-0.071,<br>-0.033) | <b>0.038</b><br>(0.0026,<br>0.074) |                                     |                                                                                             |
|                                                                           | Externality cost | -0.20 × 10 <sup>-3</sup><br>(-1.08 × 10 <sup>-3</sup> ,<br>0.69 × 10 <sup>-3</sup> )         | <b>1.76 × 10<sup>-3</sup></b><br>(0.39 × 10 <sup>-3</sup> ,<br>3.12 × 10 <sup>-3</sup> )    | 0.19<br>(-0.062, 0.45)          | <b>-0.12</b><br>(-0.15,<br>-0.092)   | -0.029<br>(-0.082,<br>0.023)       |                                     |                                                                                             |
|                                                                           |                  | Inorganic N                                                                                  | Organic N                                                                                   | Tillage                         | Irrigation                           | Soil pH                            | PC1                                 | PC2                                                                                         |
| rotational<br>n = 80<br># studies = 12<br><br>(Fig. 2a)                   | Land cost        | <b>-1.46 × 10<sup>-3</sup></b><br>(-1.70 × 10 <sup>-3</sup> ,<br>-1.22 × 10 <sup>-3</sup> )  | <b>-0.89 × 10<sup>-3</sup></b><br>(-1.54 × 10 <sup>-3</sup> ,<br>-0.25 × 10 <sup>-3</sup> ) | 0.023<br>(-0.27, 0.31)          | -0.018<br>(-0.21, 0.18)              | 0.081<br>(-0.016, 0.18)            | -0.015<br>(-0.062,<br>0.032)        | -0.022<br>(-0.068,<br>0.023)                                                                |
|                                                                           | Externality cost | 1.28 × 10 <sup>-4</sup><br>(-3.34 × 10 <sup>-4</sup> ,<br>5.95 × 10 <sup>-4</sup> )          | <b>1.56 × 10<sup>-3</sup></b><br>(0.32 × 10 <sup>-3</sup> ,<br>2.74 × 10 <sup>-3</sup> )    | -0.083<br>(-0.65, 0.45)         | <b>-0.51</b><br>(-0.89, -0.13)       | 0.086<br>(-0.038, 0.21)            | <b>-0.094</b><br>(-0.17,<br>-0.011) | 0.016<br>(-0.047,<br>0.081)                                                                 |
| rotational<br>with energy<br>allocation<br><br>(Supplementary<br>Fig. 2a) | Land cost        | <b>-1.45 × 10<sup>-3</sup></b><br>(-1.69 × 10 <sup>-3</sup> ,<br>-1.20 × 10 <sup>-3</sup> )  | <b>-0.95 × 10<sup>-3</sup></b><br>(-1.60 × 10 <sup>-3</sup> ,<br>-0.30 × 10 <sup>-3</sup> ) | -0.0084<br>(-0.30, 0.28)        | -0.020<br>(-0.22, 0.17)              | <b>0.11</b><br>(0.012, 0.22)       | -0.037<br>(-0.086,<br>0.011)        | -0.013<br>(-0.063,<br>0.034)                                                                |
|                                                                           | Externality cost | 1.62 × 10 <sup>-4</sup><br>(-2.62 × 10 <sup>-4</sup> ,<br>6.13 × 10 <sup>-4</sup> )          | <b>1.50 × 10<sup>-3</sup></b><br>(0.29 × 10 <sup>-3</sup> ,<br>2.58 × 10 <sup>-3</sup> )    | -0.14<br>(-0.71, 0.43)          | <b>-0.52</b><br>(-0.90, -0.17)       | 0.11<br>(-0.032, 0.26)             | <b>-0.11</b><br>(-0.20,<br>-0.028)  | 0.032<br>(-0.044, 0.10)                                                                     |
| Rice – Water                                                              |                  | Inorganic N                                                                                  | Irrigation<br>CF-drain                                                                      | Irrigation<br>AWD               | Irrigation<br>CI                     | Irrigation<br>F-M                  | Irrigation<br>Dry                   | Rainfall                                                                                    |
| n = 123<br># studies = 15<br><br>(Fig. 2b)                                | Land cost        | <b>-1.68 × 10<sup>-3</sup></b><br>(-2.02 × 10 <sup>-3</sup> ,<br>-1.33 × 10 <sup>-3</sup> )  | 0.021<br>(-0.056, 0.098)                                                                    | -0.0076<br>(-0.066, 0.051)      | 0.088<br>(-0.010, 0.19)              | 0.041<br>(-0.071, 0.15)            | 0.066<br>(-0.039,<br>0.17)          | -0.70 × 10 <sup>-4</sup><br>(-2.66 × 10 <sup>-4</sup> ,<br>1.21 × 10 <sup>-4</sup> )        |
|                                                                           | Externality cost | -1.26 × 10 <sup>-3</sup><br>(-2.64 × 10 <sup>-3</sup> ,<br>0.13 × 10 <sup>-3</sup> )         | -0.095<br>(-0.41, 0.22)                                                                     | <b>-0.53</b><br>(-0.76, -0.28)  | <b>-0.88</b><br>(-1.28, -0.48)       | <b>-1.12</b><br>(-1.58, -0.65)     | <b>-1.29</b><br>(-1.72,<br>-0.87)   | <b>-1.12 × 10<sup>-3</sup></b><br>(-1.90 × 10 <sup>-3</sup> ,<br>-0.35 × 10 <sup>-3</sup> ) |
| excluding three<br>records in ref. 68                                     | Land cost        | <b>-1.67 × 10<sup>-3</sup></b><br>(-2.02 × 10 <sup>-3</sup> ,<br>-1.32 × 10 <sup>-3</sup> )  | 0.023<br>(-0.057, 0.10)                                                                     | -0.0066<br>(-0.068, 0.055)      | 0.089<br>(-0.011, 0.19)              | 0.042<br>(-0.072, 0.16)            | 0.067<br>(-0.040,<br>0.17)          | -1.02 × 10 <sup>-4</sup><br>(-3.94 × 10 <sup>-4</sup> ,<br>1.87 × 10 <sup>-4</sup> )        |
| n = 120<br># studies = 15<br>(Supplementary<br>Fig. 2b)                   | Externality cost | <b>-1.41 × 10<sup>-3</sup></b><br>(-2.73 × 10 <sup>-3</sup> ,<br>-0.068 × 10 <sup>-3</sup> ) | -0.14<br>(-0.44, 0.17)                                                                      | <b>-0.53</b><br>(-0.77, -0.30)  | <b>-0.92</b><br>(-1.31, -0.54)       | <b>-1.19</b><br>(-1.64, -0.74)     | <b>-1.32</b><br>(-1.72,<br>-0.91)   | 0.28 × 10 <sup>-3</sup><br>(-0.82 × 10 <sup>-3</sup> ,<br>1.38 × 10 <sup>-3</sup> )         |
| Wheat - GHG                                                               |                  | Ammonium N<br>rate                                                                           | Urea N rate                                                                                 | dicyandiamide<br>rate           |                                      |                                    |                                     |                                                                                             |
| n = 96<br># regions = 3<br><br>(Fig. 2c)                                  | Land cost        | <b>-4.17 × 10<sup>-3</sup></b><br>(-4.87 × 10 <sup>-3</sup> ,<br>-3.47 × 10 <sup>-3</sup> )  | <b>-3.97 × 10<sup>-3</sup></b><br>(-4.92 × 10 <sup>-3</sup> ,<br>-3.02 × 10 <sup>-3</sup> ) | -0.0035<br>(-0.011,<br>0.0039)  |                                      |                                    |                                     |                                                                                             |
|                                                                           | Externality cost | <b>1.10 × 10<sup>-3</sup></b><br>(0.25 × 10 <sup>-3</sup> ,<br>1.94 × 10 <sup>-3</sup> )     | -0.37 × 10 <sup>-3</sup><br>(-1.51 × 10 <sup>-3</sup> ,<br>0.77 × 10 <sup>-3</sup> )        | -0.0080<br>(-0.017,<br>0.00086) |                                      |                                    |                                     |                                                                                             |

| Beef – GHG (empirical) |                  | Improved breed | Supplementary feed | Improved pasture      |
|------------------------|------------------|----------------|--------------------|-----------------------|
| n = 33                 | Land cost        | -0.41          | -0.36              | <b>-1.26</b>          |
| # studies = 8          |                  | (-1.01, 0.19)  | (-0.92, 0.20)      | <b>(-1.81, -0.68)</b> |
| (Fig. 2e)              | Externality cost | -0.022         | -0.14              | <b>-0.38</b>          |
|                        |                  | (-0.26, 0.23)  | (-0.34, 0.071)     | <b>(-0.57, -0.17)</b> |

**Supplementary Table 3. Summary of input settings used to characterise contrasting Brazilian beef production systems in RUMINANT and DYNMOD.**

|                                                      | <b>pasture systems</b>                                                                                                      | <b>silvopasture systems</b> | <b>feedlot-finishing systems</b>                                   |
|------------------------------------------------------|-----------------------------------------------------------------------------------------------------------------------------|-----------------------------|--------------------------------------------------------------------|
| <b>forage quality</b>                                | very low (i.e. unimproved), low, moderate or high                                                                           |                             | high or very high                                                  |
| <b>feed type</b>                                     | none, moderate quality grain or high quality grain (boosted in silvopasture systems to simulate access to <i>Leucaena</i> ) |                             | mixed ration while in feedlot, high quality grain while on pasture |
| <b>feed quantity (kg/animal/day)</b>                 |                                                                                                                             | 0, 0.5, 1 or 2              | 1.1-2.5 (over life, and adjusted in feedlot to meet target weight) |
| <b>cattle breed</b>                                  | unimproved or improved                                                                                                      | unimproved or improved      | unimproved or improved                                             |
| <b>replacement rate (%/year)</b>                     | 7.5, 10 or 20                                                                                                               | 20                          | 10 or 20                                                           |
| <b>age at first calving (years)</b>                  | 3, 4 or 4.5                                                                                                                 | 3                           | 3 or 4                                                             |
| <b>parturition rate (%/year/reproductive female)</b> | 55, 65 or 80                                                                                                                | 80                          | 65 or 80                                                           |
| <b>adult mortality (%/year)</b>                      | 2, 4 or 5                                                                                                                   | 2                           | 2 or 4                                                             |
| <b>juvenile mortality (%/year)</b>                   | 5, 8 or 10                                                                                                                  | 5                           | 5 or 8                                                             |



**Supplementary Table 4. Profile of the key features of our contrasting model systems of UK dairy production.**

|                                                   | conventional                    |               |                                                           | organic     |               |
|---------------------------------------------------|---------------------------------|---------------|-----------------------------------------------------------|-------------|---------------|
|                                                   | C1                              | C2            | C3                                                        | O1          | O2            |
| grazing access (days/year)                        | 270                             | 180           | 0                                                         | 270         | 200           |
| milk yield (Energy-Corrected Milk kg/animal-year) | 5500                            | 7800          | 9200                                                      | 4700        | 6300          |
| proportion of forage when grazing                 |                                 |               |                                                           |             |               |
| <i>grazed grass</i>                               | 1                               | 0.5           | n/a                                                       | 1           | 1             |
| <i>grass silage</i>                               | 0                               | 0.5           | n/a                                                       | 0           | 0             |
| proportion of forage when housed                  |                                 |               |                                                           |             |               |
| <i>grass silage</i>                               | 1                               | 1             | 0.5                                                       | 1           | 1             |
| <i>maize silage</i>                               | 0                               | 0             | 0.5                                                       | 0           | 0             |
| replacement rate (%)                              | 31                              | 28            | 33                                                        | 28          | 30            |
| age at first calving (months)                     | 26                              | 30            | 26                                                        | 34          | 34            |
| mean live weight of replacements (kg)             | 340                             | 372           | 340                                                       | 404         | 404           |
| area used (ha/animal*)                            |                                 |               |                                                           |             |               |
| <i>grazing</i>                                    | 0.367                           | 0.122         | 0.039                                                     | 0.472       | 0.326         |
| <i>grass silage</i>                               | 0.130                           | 0.268         | 0.182                                                     | 0.201       | 0.381         |
| <i>maize silage</i>                               | 0                               | 0             | 0.096                                                     | 0           | 0             |
| <i>concentrates</i>                               | 0.053                           | 0.129         | 0.161                                                     | 0.191       | 0.419         |
| <i>total</i>                                      | 0.550                           | 0.519         | 0.478                                                     | 0.864       | 1.126         |
| N excreted (kg/animal*-year)                      | 110                             | 105           | 116                                                       | 106         | 109           |
| P excreted (kg/animal*-year)                      | 15.0                            | 17.5          | 18.1                                                      | 14.8        | 17.2          |
| manure management – housing                       |                                 |               |                                                           |             |               |
| <i>dairy adults</i>                               | slurry                          | slurry        | slurry                                                    | straw       | slurry        |
| <i>young stock</i>                                | straw                           | straw         | straw                                                     | straw       | straw         |
| <i>beef</i>                                       | straw                           | straw         | straw                                                     | straw       | straw         |
| manure management – hardstanding (h/day)          | 4                               | 4             | 0                                                         | 4           | 4             |
| manure management – storage                       |                                 |               |                                                           |             |               |
| <i>dairy slurry</i>                               | above-ground tank, no separator |               |                                                           | farmyard    | as C1-C3      |
| <i>beef and youngstock</i>                        | farmyard manure heap            |               |                                                           | manure heap | as C1-C3      |
| manure management – land spreading                |                                 |               |                                                           |             |               |
| <i>dairy slurry</i>                               | trailing shoe                   | trailing shoe | 50% grass trailing shoe, 50% on maize incorporated within | surface     | trailing shoe |
| <i>beef and youngstock</i>                        | surface                         | surface       | 6h                                                        | surface     | surface       |

\*an animal is an adult cow plus her replacements

**Supplementary Table 5. Sources of values used to estimate the rate of accumulation of above- and below-ground carbon when farmland recovers to natural habitat.**

| <b>variable</b>                                                             | <b>value(s) used</b>                              | <b>source</b>        |
|-----------------------------------------------------------------------------|---------------------------------------------------|----------------------|
| <b>rate of recovery of above-ground biomass (tonnes dry matter/ha-year)</b> | domain-, ecosystem- and continent-specific values | Table 4.9 in ref. 32 |
| <b>carbon content of biomass (tonnes C/tonne dry matter)</b>                | 0.47                                              | Table 4.3 in ref. 32 |
| <b>soil carbon content of natural habitat (tonnes C/ha)</b>                 | climate- and soil-specific values                 | Table 2.3 in ref. 32 |
| <b>proportional change in soil carbon upon land-use transition</b>          | transition-specific values                        | Ref. 113             |
